# Supplementary material for: Phase 2 Study of Pomalidomide (CC-4047) Monotherapy for Children and Young Adults With Recurrent or Progressive Primary Brain Tumors
Source: PubMed Central journal article supplement (PMC8218626; doi:10.3389/fonc.2021.660892), 2021-06-08
Supplement: DataSheet_1.pdf [file DataSheet_1.pdf]

## Supplemental Materials

**Supplementary Table 1** Cumulative Exposure and Dose Intensity (safety population)

| <b>Parameter, median (range)</b>     | <b>HGG<br/>n = 22</b>  | <b>DIPG<br/>n = 11</b> | <b>Ependymoma<br/>n = 9</b> | <b>Medulloblastoma<br/>n = 10</b> |
|--------------------------------------|------------------------|------------------------|-----------------------------|-----------------------------------|
| Cumulative dose, mg/m <sup>2</sup>   | 67.26<br>(29.8-1011.4) | 157.15<br>(18.9-860.9) | 205.53<br>(55.6-479.4)      | 112.81<br>(56.8-208.8)            |
| Relative dose intensity <sup>a</sup> | 1.01<br>(0.6-1.4)      | 0.99<br>(0.8-1.4)      | 1.02<br>(0.9-1.1)           | 0.98<br>(0.9-1.1)                 |

DIPG, diffuse intrinsic pontine glioma; HGG, high-grade glioma.

<sup>a</sup> Defined as dose intensity divided by planned dose intensity.

**Supplementary Table 2** Summary of POM Plasma Concentrations by Disease Indication and Scheduled Time Point

(pharmacokinetics population)

| Geometric mean<br>(geometric CV%) | HGG                          |                               | DIPG                         |                              | Ependymoma                  |                              | Medulloblastoma             |                              |
|-----------------------------------|------------------------------|-------------------------------|------------------------------|------------------------------|-----------------------------|------------------------------|-----------------------------|------------------------------|
|                                   | Cycle 1<br>Day 8<br>(n = 14) | Cycle 1<br>Day 15<br>(n = 14) | Cycle 1<br>Day 8<br>(n = 10) | Cycle 1<br>Day 15<br>(n = 9) | Cycle 1<br>Day 8<br>(n = 6) | Cycle 1<br>Day 15<br>(n = 8) | Cycle 1<br>Day 8<br>(n = 8) | Cycle 1<br>Day 15<br>(n = 8) |
|                                   | Predose                      | 21.48<br>(95.0)               | 14.72<br>(103.2)             | 11.24<br>(220.0)             | 10.67<br>(273.2)            | 22.23<br>(105.5)             | 8.72<br>(323.7)             | 9.0<br>(144.5)               |
| 2 hours postdose                  | 66.40<br>(119.2)             | 60.80<br>(61.3)               | 61.10<br>(108.6)             | 62.04<br>(106.7)             | 77.20<br>(90.0)             | 97.88<br>(9.4)               | 89.71<br>(64.1)             | 77.08<br>(61.9)              |

CV, coefficient of variation; DIPG, diffuse intrinsic pontine glioma; HGG, high-grade glioma; POM, pomalidomide.

Supplementary Fig. 1 Study Design

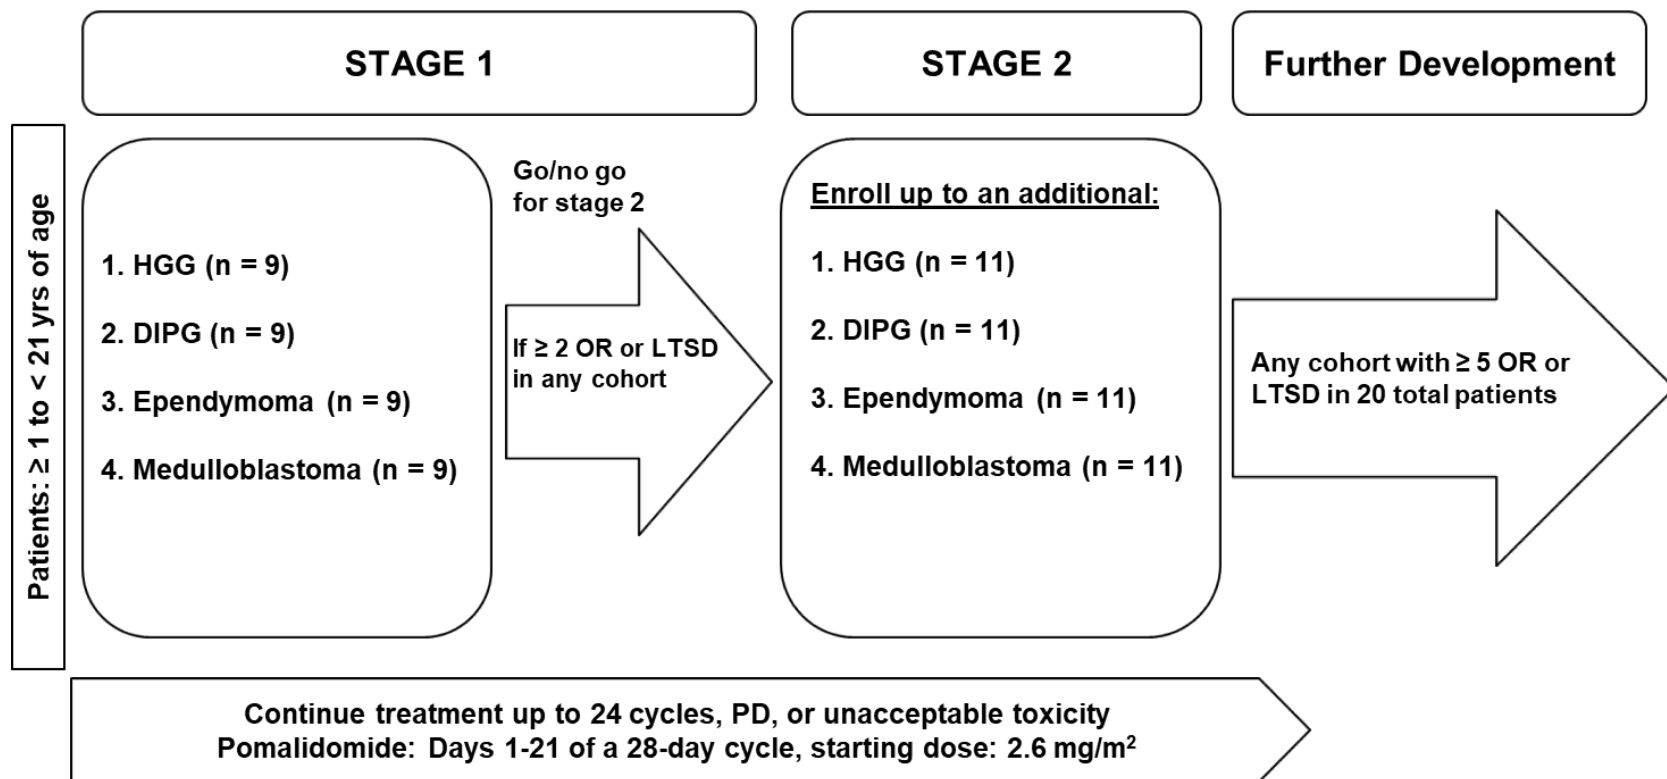

DIPG, diffuse intrinsic pontine glioma; HGG, high-grade glioma; LTSD, long-term stable disease (maintained for  $\geq 6$  cycles [ $\geq 3$  cycles for DIPG]); OR, objective response (either complete or partial response).
